# Supplementary material for: Metabolism of Diterpenoids Derived from the Bark of Cinnamomum cassia in Human Liver Microsomes
Source: MDPI journal article supplement (doi:10.3390/pharmaceutics13081316), 2021-08-23
Supplement: s1 [file s1]

# Supplementary Materials: Metabolism of Diterpenoids Derived from the Bark of *Cinnamomum cassia* in Human Liver Microsomes

Su Min Choi, Van Cong Pham, Sangkyu Lee and Jeong Ah Kim

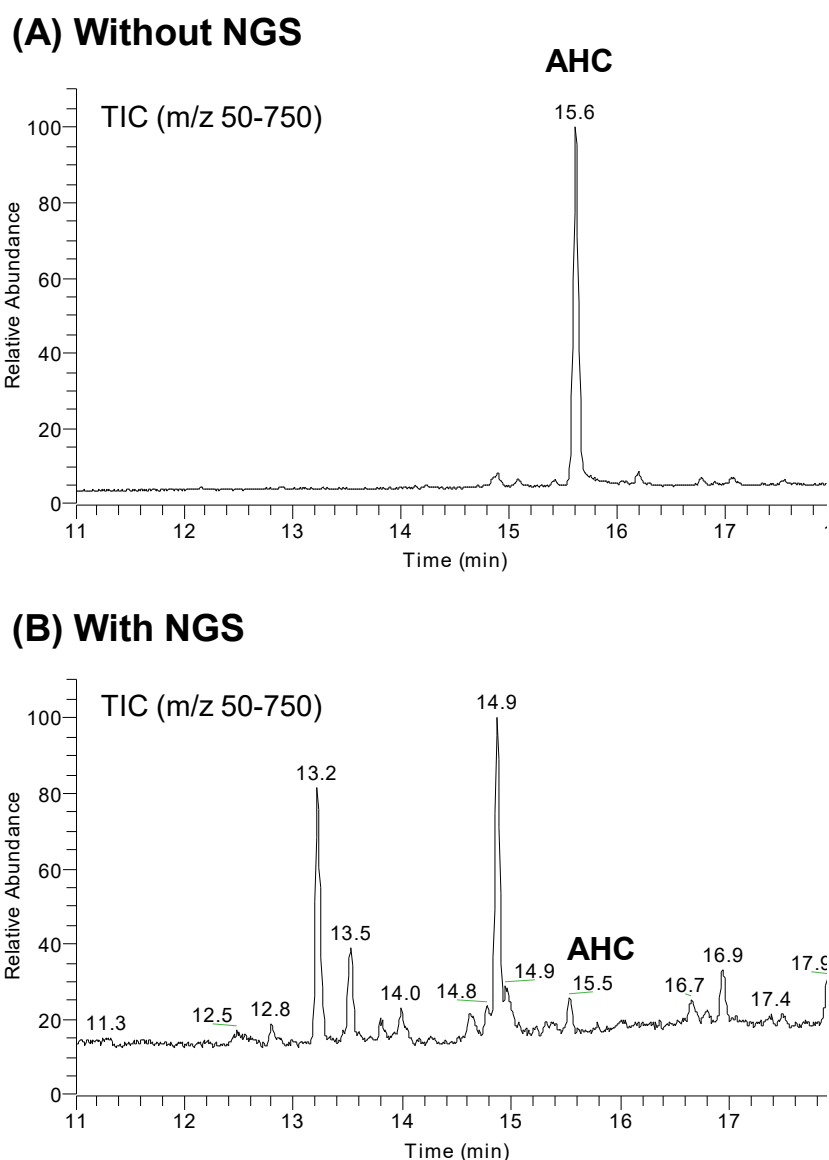

**Figure S1.** Total ion chromatograms (TIC) for anhydrocinnzeylanine (AHC) and its metabolites. AHC (10  $\mu$ M) was incubated with 1 mg/mL of pooled human liver microsomes for 60 min in the absence (A) or presence (B) of a  $\beta$ -NADPH-regenerating system (NGS).

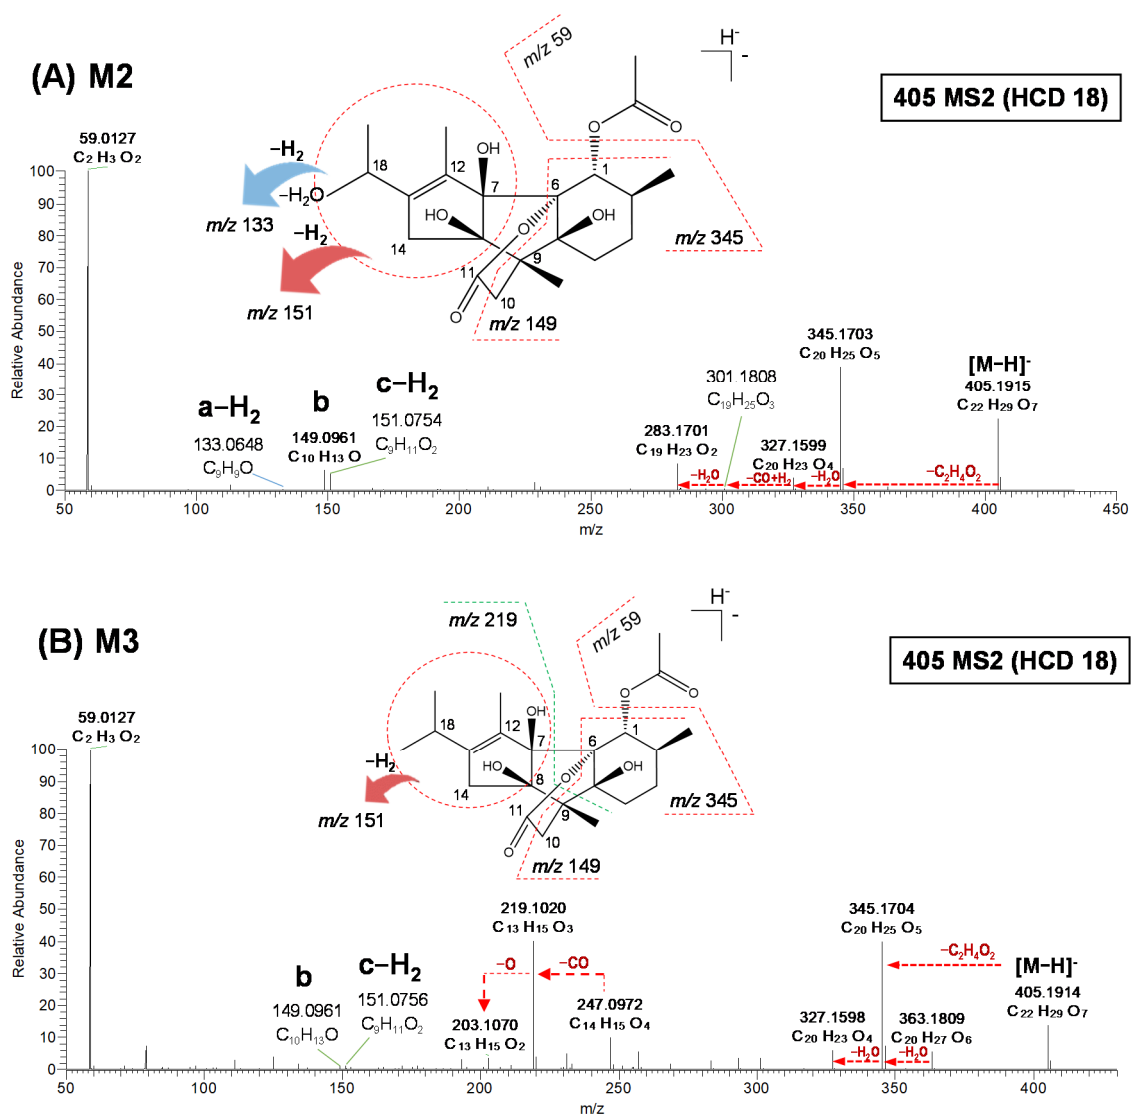

**Figure S2.** MS/MS spectra of dehydrogenated M2 (A) and M3 (B) using a high-resolution quadrupole-orbitrap mass spectrometer.

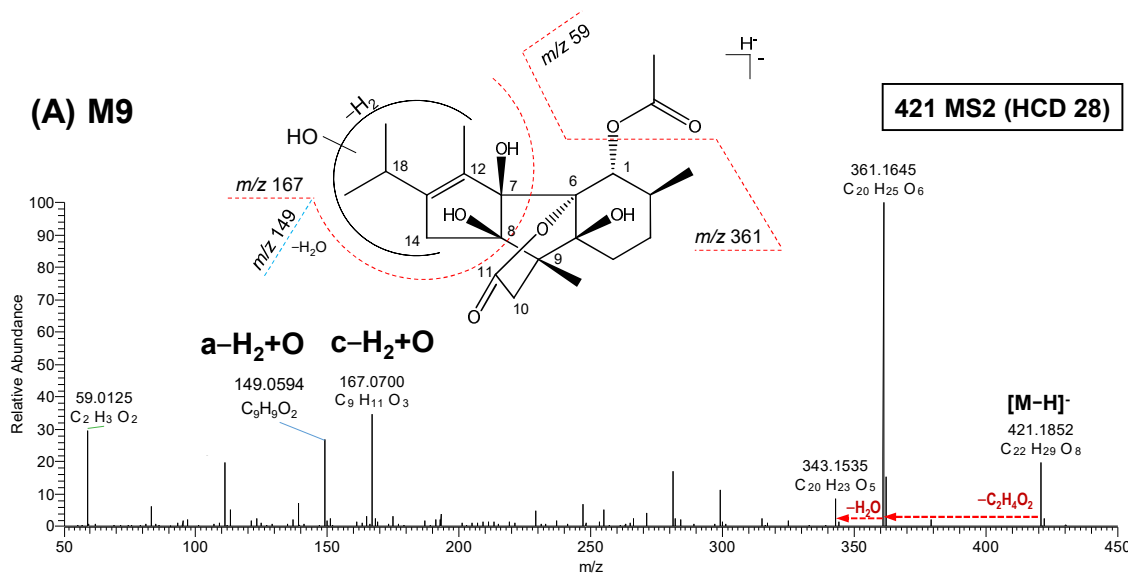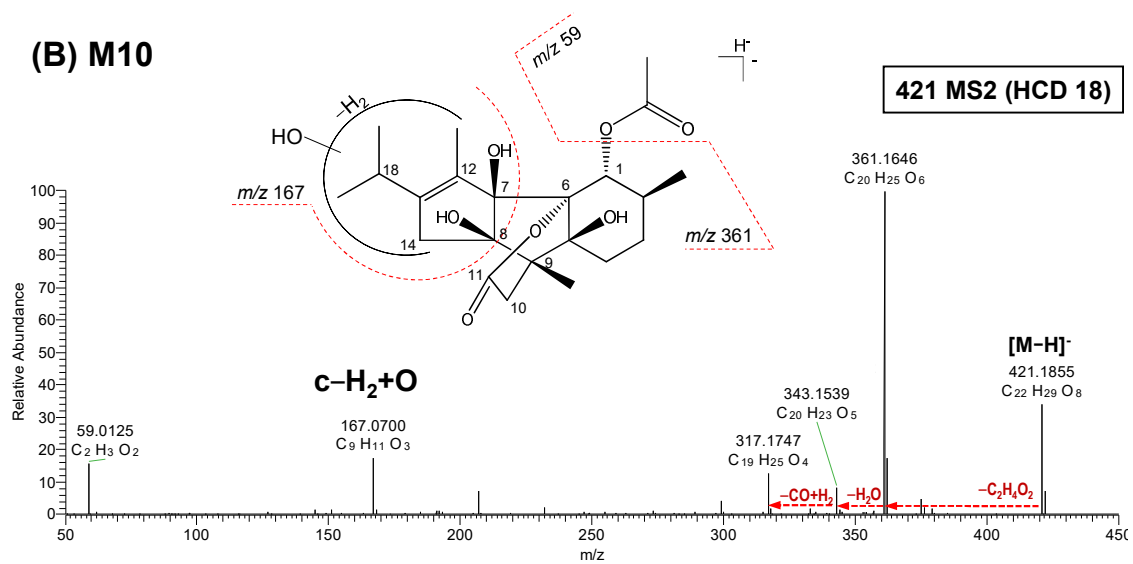

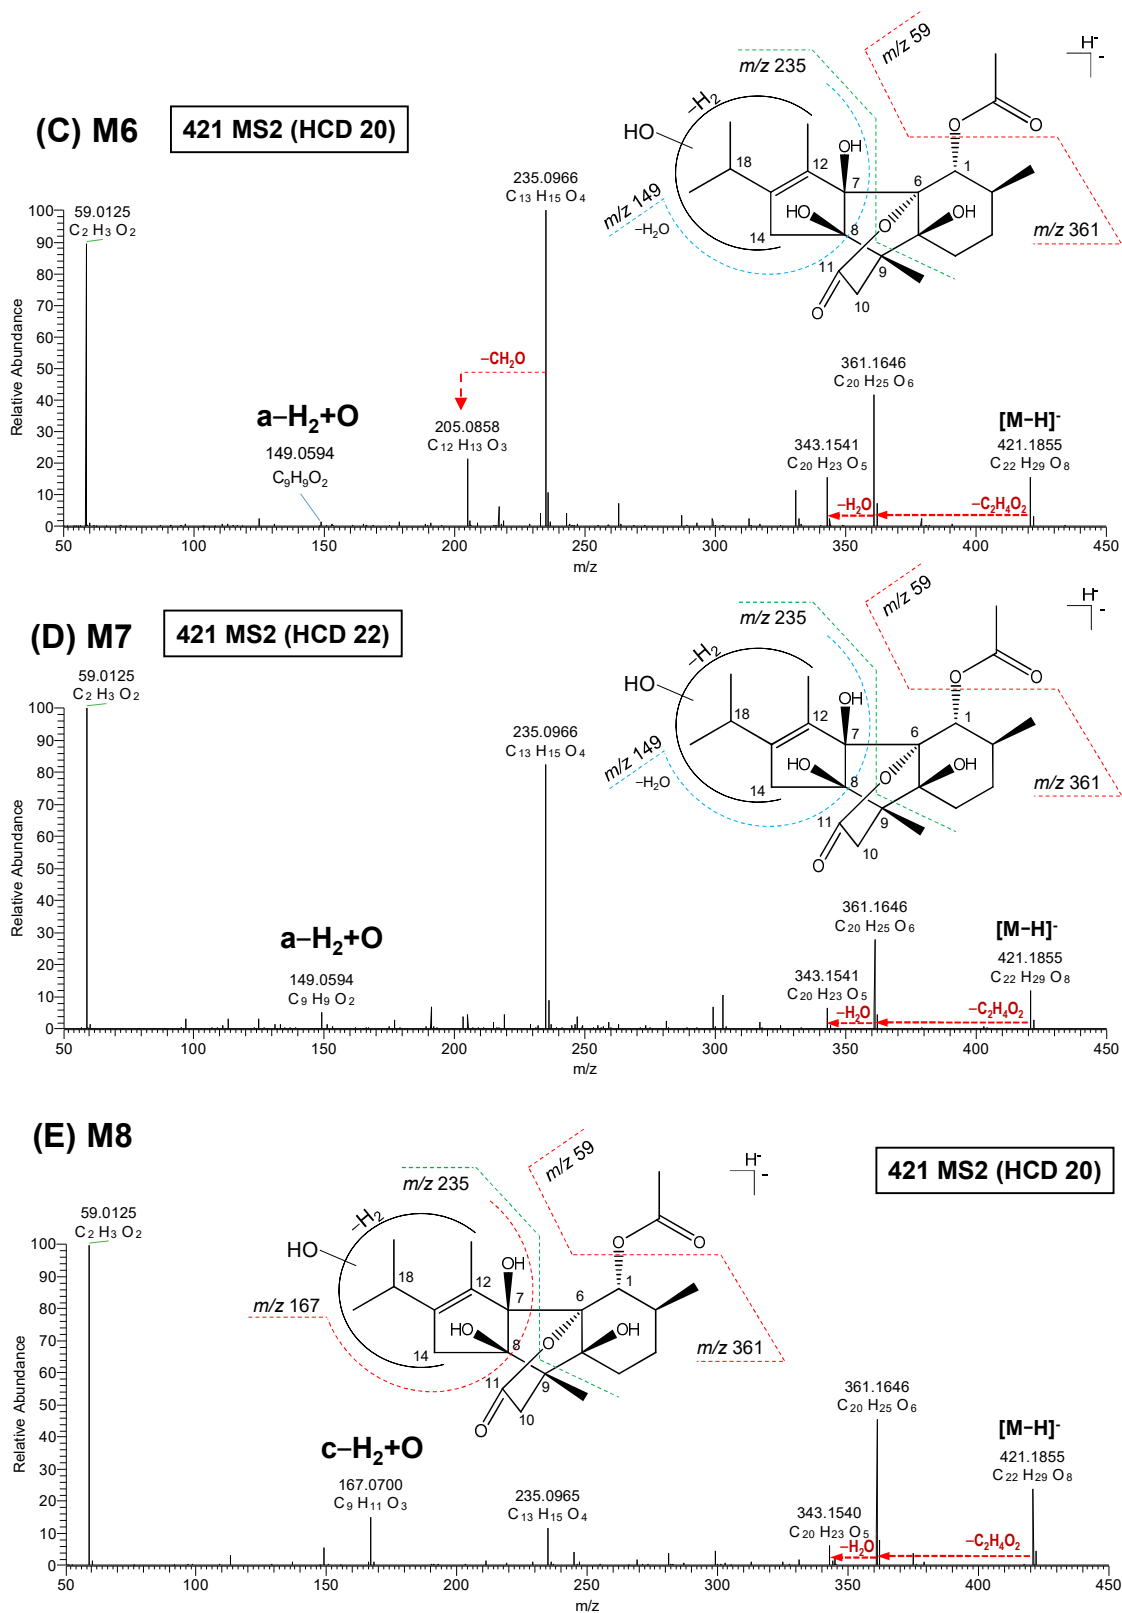

**Figure S3.** MS/MS spectra of dehydrogenated M9 (A), M10 (B), M6 (C), M7 (D) and M8 (E) using a high-resolution quadrupole-orbitrap mass spectrometer.

**(A) M12**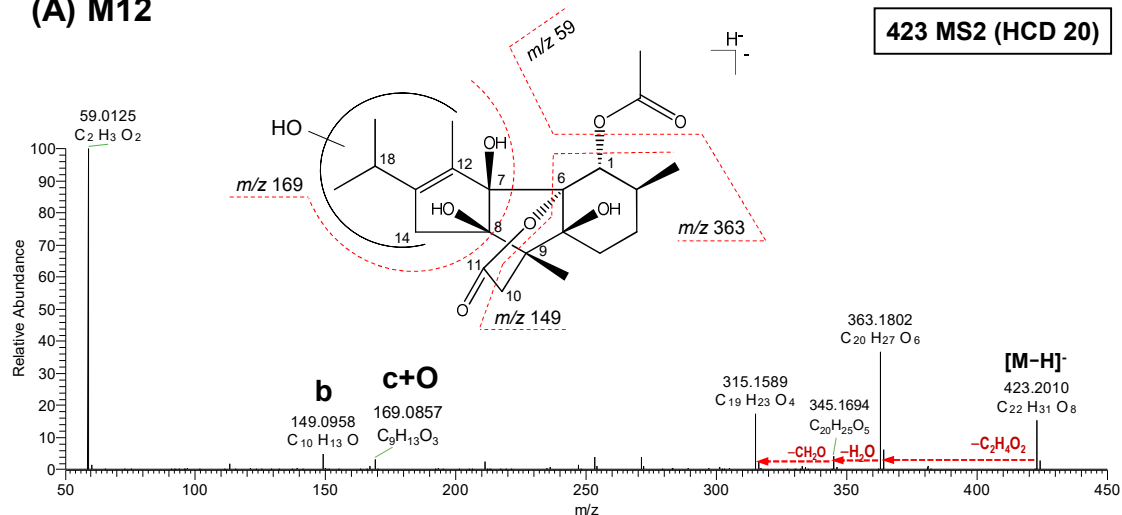**(B) M13**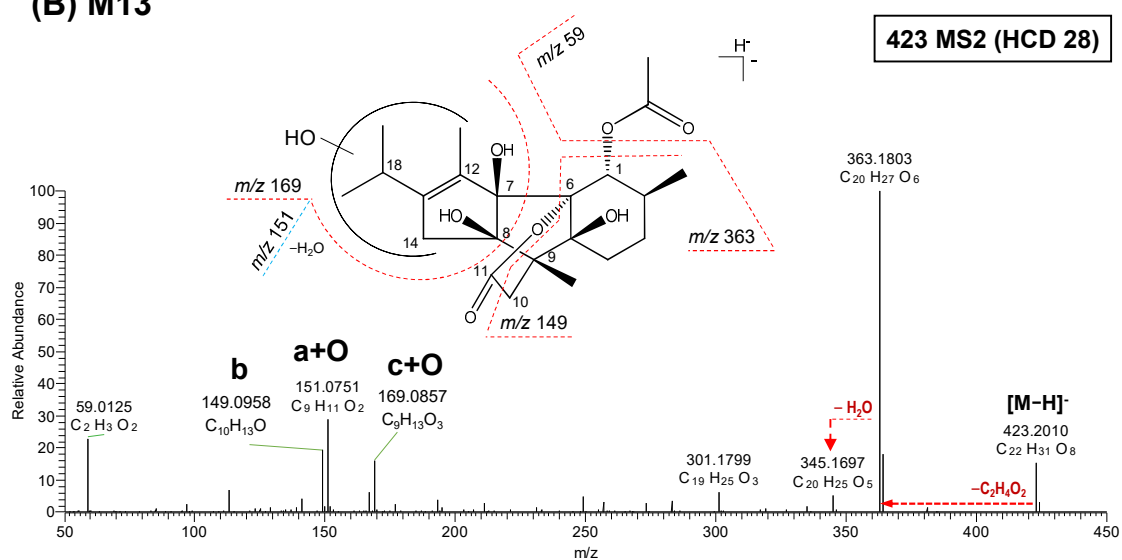

**Figure S4.** MS/MS spectra of dehydrogenated M12 (A) and M13 (B) using a high-resolution quadrupole-orbitrap mass spectrometer.

(A) M15

439 MS2 (HCD 28)

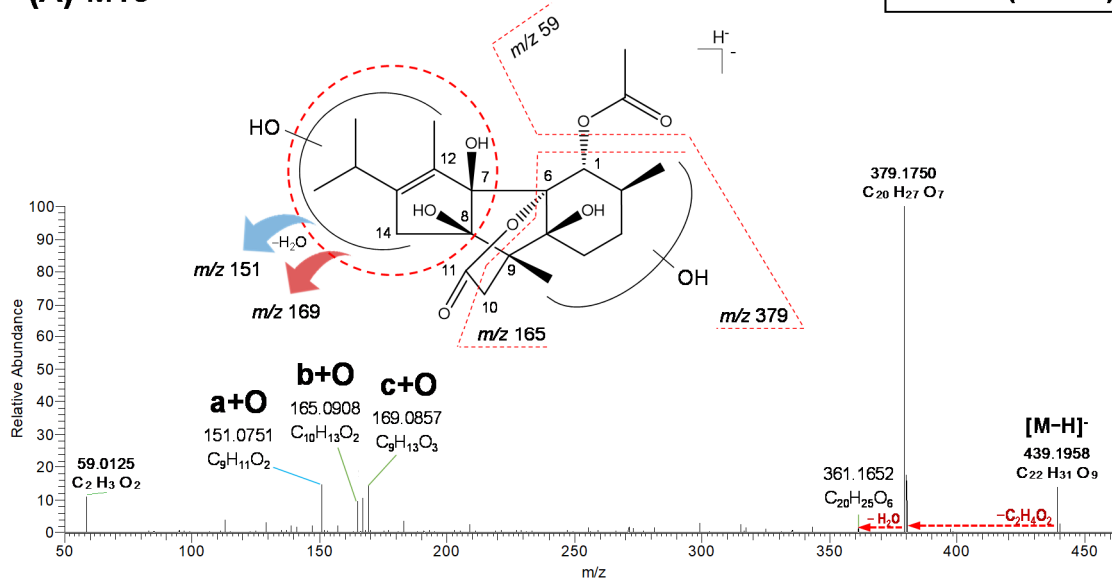

(B) M19

439 MS2 (HCD 33)

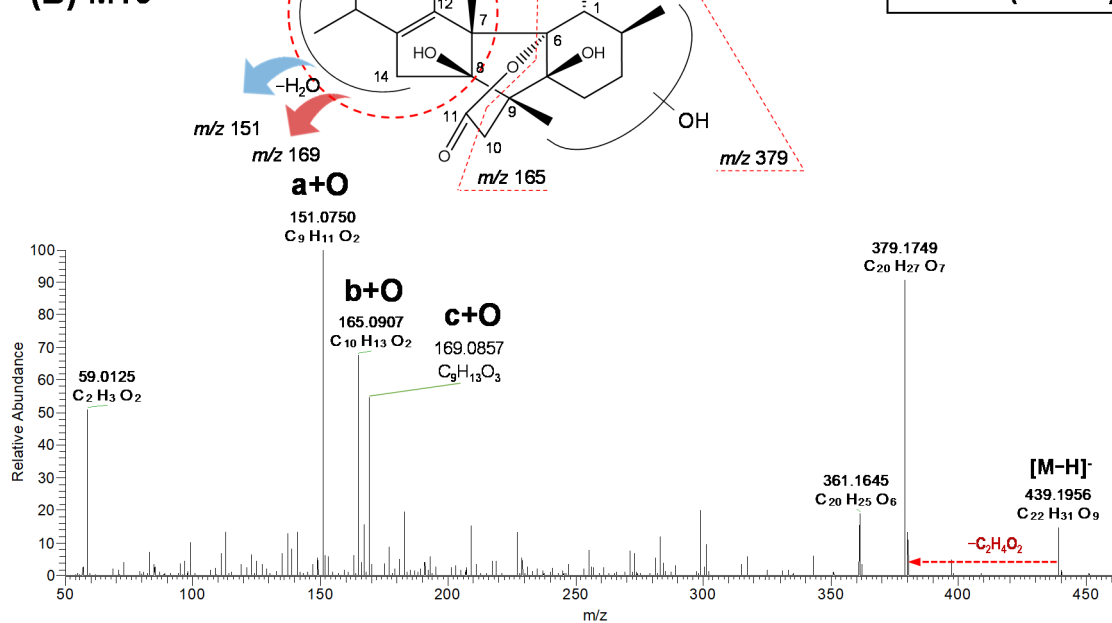

**Figure S5.** MS/MS spectra of dehydrogenated M15 (A) and M19 (B) using a high-resolution quadrupole-orbitrap mass spectrometer.

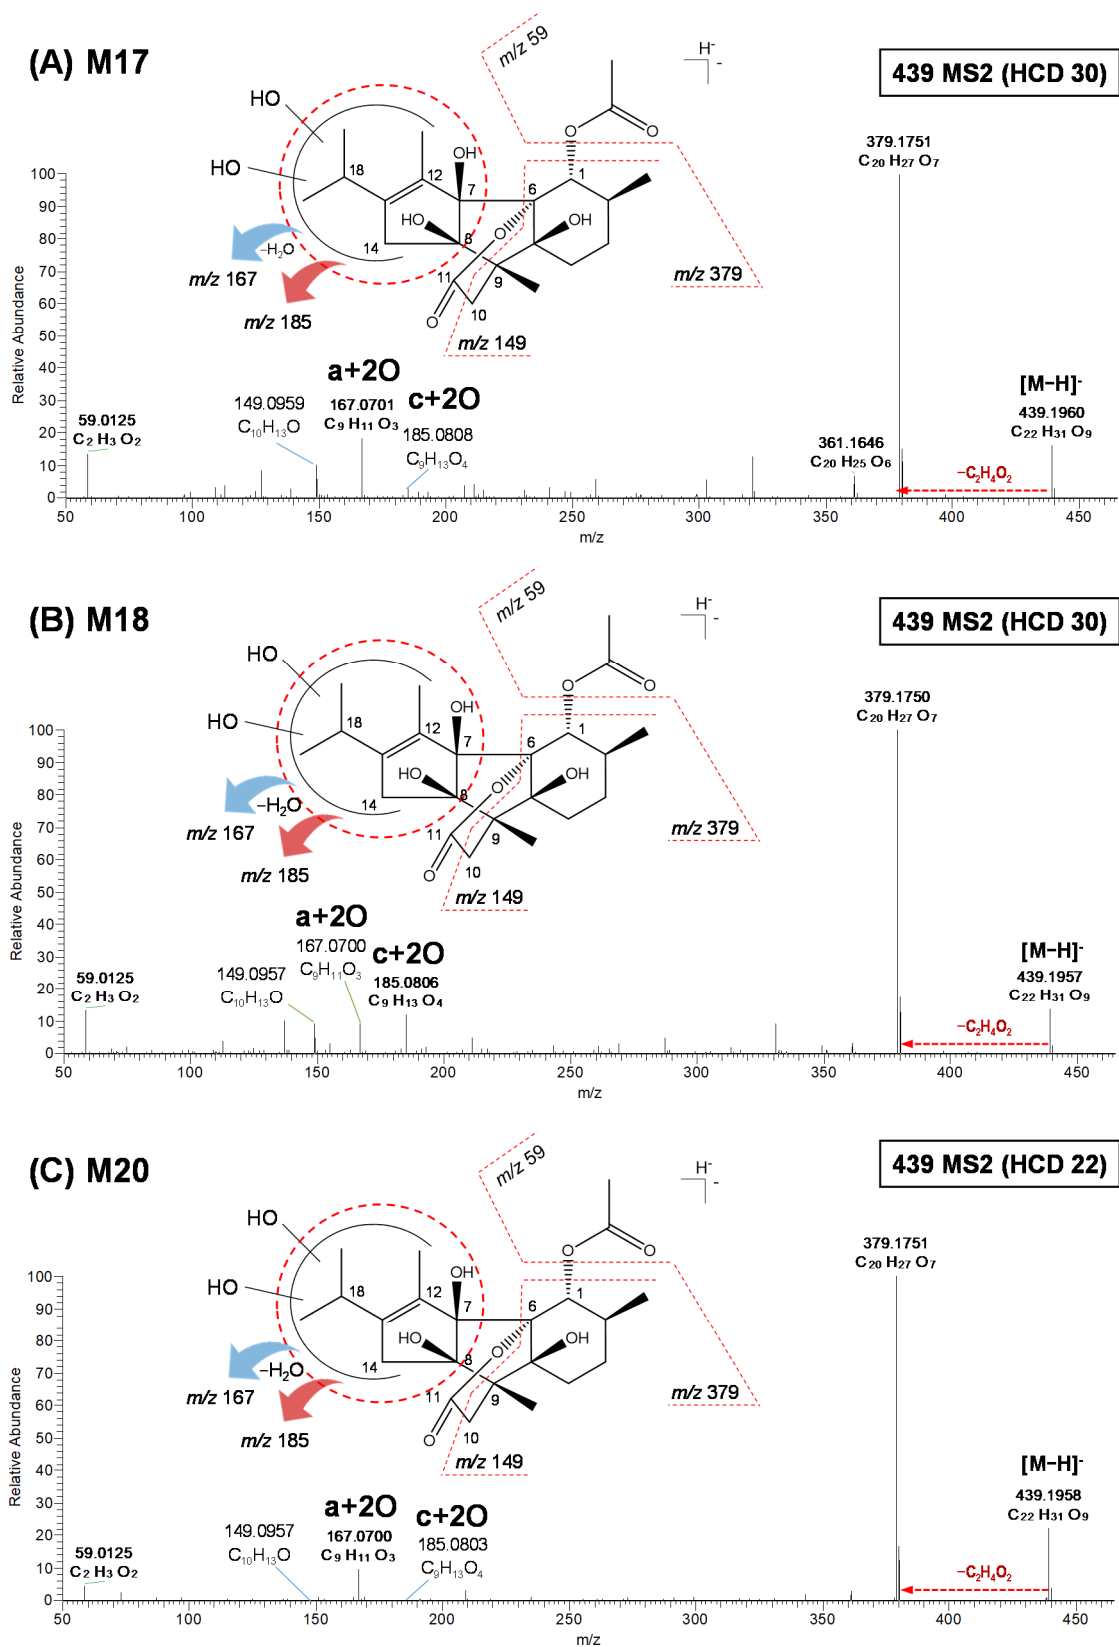

**Figure S6.** MS/MS spectra of dehydrogenated M17 (A), M18 (B) and M20 (C) using a high-resolution quadrupole-orbitrap mass spectrometer.

**(A)**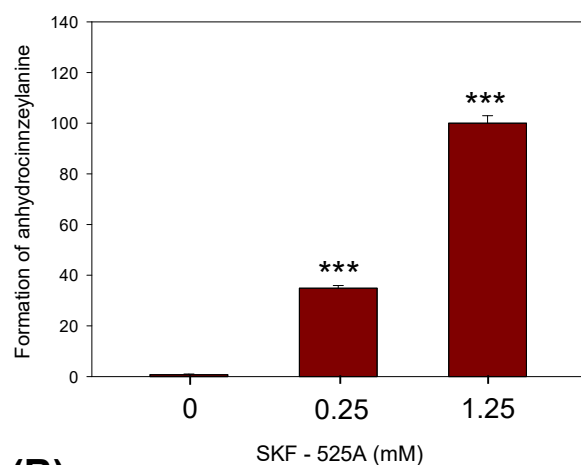**(B)**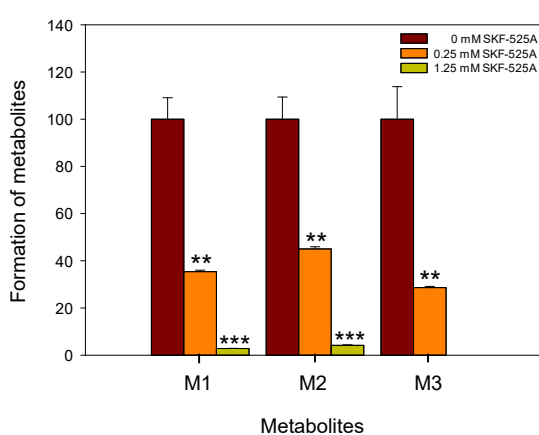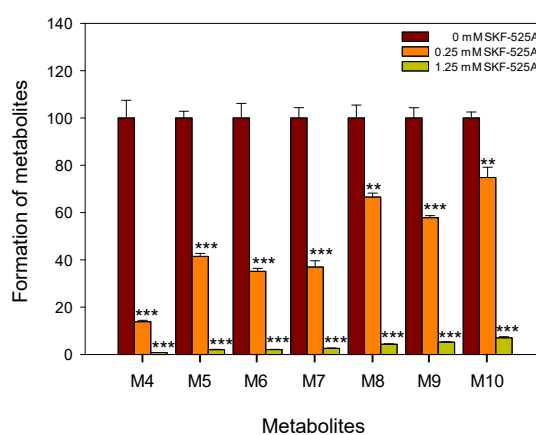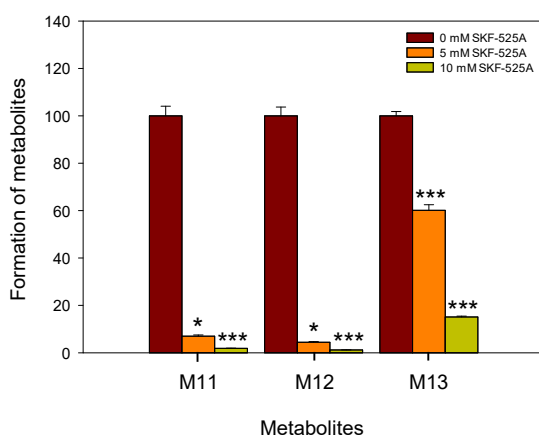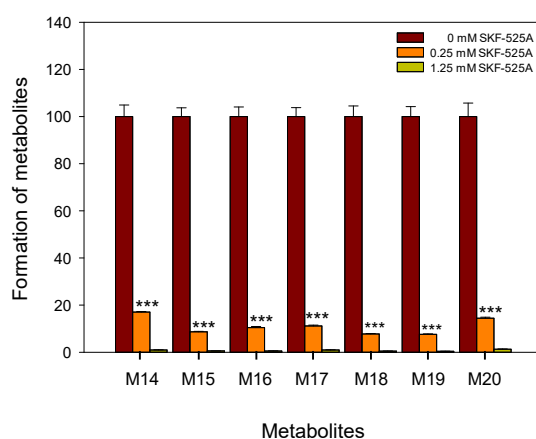

**Figure S7.** Effect of non-specific CYP inhibitor, SKF 525-A in AHC metabolism in HLMs. Inhibition of AHC metabolism by SKF-525 treatment (0, 0.25 and 1.25 mM) (A). Decreased of formation of M1, M2 and M3 (B), M4–M10 (C), M11–M13 (D) and M14–M20 (E). The data are expressed as mean  $\pm$  standard errors (SE) of the triplicate samples. Bars indicate standard error ( $n = 3$ ). \*  $p < 0.05$ , \*\*  $p < 0.01$  and \*\*\*  $p < 0.001$  vs 0 mM SKF-525A.



## CYP3A5

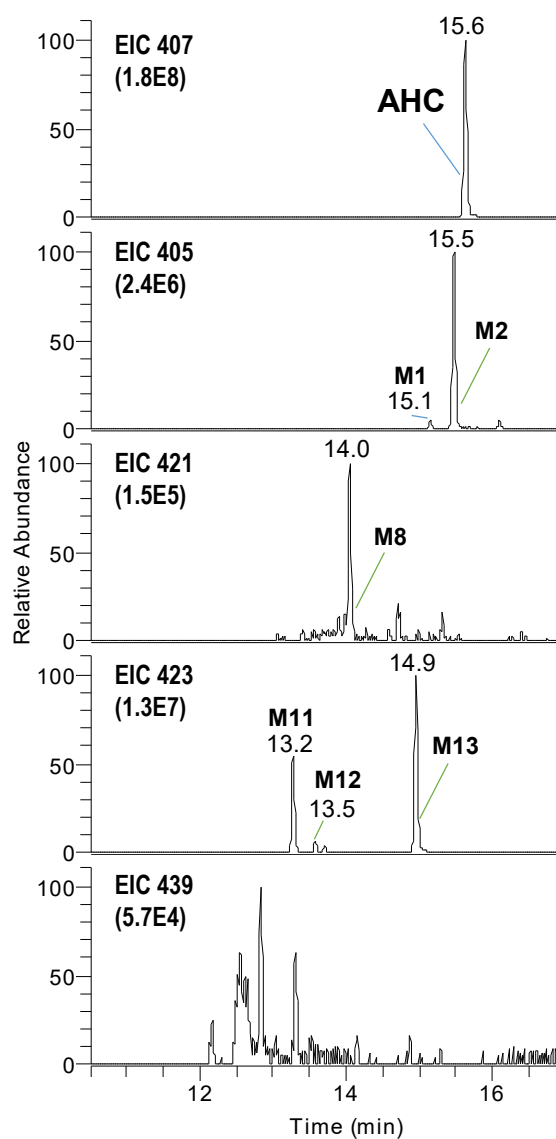

**Figure S8.** The formation of AHC metabolites in recombinant *cDNA-expressed CYP3A5* after incubation at 37 °C for 60 min.

**Table S1.** Elemental composition of key product ions of anhydrocinnzeylanine and its metabolites in human liver micro-somes using high-resolution quadrupole-orbitrap mass spectrometry.

| Compound                  | Precursor Ions (m/z) |                                                |             | CE<br>(eV) | Product Ion<br>(m/z) | Elemental<br>Comp. (exp.)                      | Error<br>(ppm) |
|---------------------------|----------------------|------------------------------------------------|-------------|------------|----------------------|------------------------------------------------|----------------|
|                           | [M-H] <sup>-</sup>   | Elemental<br>Comp. (exp.)                      | Error (ppm) |            |                      |                                                |                |
| Anhydro-<br>cinnzeylanine | 407.2072             | C <sub>22</sub> H <sub>31</sub> O <sub>7</sub> | 1.7         | 18         | 347.1861             | C <sub>20</sub> H <sub>27</sub> O <sub>5</sub> | 2.4            |
|                           |                      |                                                |             | 18         | 329.1757             | C <sub>20</sub> H <sub>25</sub> O <sub>4</sub> | 2.3            |
|                           |                      |                                                |             | 18         | 303.1963             | C <sub>19</sub> H <sub>27</sub> O <sub>3</sub> | 2.6            |
|                           |                      |                                                |             | 18         | 285.1857             | C <sub>19</sub> H <sub>25</sub> O <sub>2</sub> | 2.7            |
|                           |                      |                                                |             | 18         | 153.0910             | C <sub>9</sub> H <sub>13</sub> O <sub>2</sub>  | 0.0            |
|                           |                      |                                                |             | 18         | 149.0962             | C <sub>10</sub> H <sub>13</sub> O              | 0.3            |
|                           |                      |                                                |             | 18         | 135.0802             | C <sub>9</sub> H <sub>11</sub> O               | 0.9            |
|                           |                      |                                                |             | 18         | 59.0127              | C <sub>2</sub> H <sub>3</sub> O <sub>2</sub>   | -1.2           |
| M1                        | 405.1914             | C <sub>22</sub> H <sub>29</sub> O <sub>7</sub> | 1.6         | 20         | 345.1703             | C <sub>20</sub> H <sub>25</sub> O <sub>5</sub> | 2.0            |
|                           |                      |                                                |             | 20         | 327.1598             | C <sub>20</sub> H <sub>23</sub> O <sub>4</sub> | 2.2            |
|                           |                      |                                                |             | 20         | 301.1805             | C <sub>19</sub> H <sub>25</sub> O <sub>3</sub> | 2.3            |
|                           |                      |                                                |             | 20         | 283.1698             | C <sub>19</sub> H <sub>23</sub> O <sub>2</sub> | 2.0            |
|                           |                      |                                                |             | 20         | 151.0754             | C <sub>9</sub> H <sub>11</sub> O <sub>2</sub>  | 0.1            |
|                           |                      |                                                |             | 20         | 149.0962             | C <sub>10</sub> H <sub>13</sub> O              | 0.2            |
|                           |                      |                                                |             | 20         | 59.0126              | C <sub>2</sub> H <sub>3</sub> O <sub>2</sub>   | -1.8           |
| M2                        | 405.1915             | C <sub>22</sub> H <sub>29</sub> O <sub>7</sub> | 1.6         | 18         | 345.1703             | C <sub>20</sub> H <sub>25</sub> O <sub>5</sub> | 2.0            |
|                           |                      |                                                |             | 18         | 327.1599             | C <sub>20</sub> H <sub>23</sub> O <sub>4</sub> | 2.4            |
|                           |                      |                                                |             | 18         | 301.1808             | C <sub>19</sub> H <sub>25</sub> O <sub>3</sub> | 3.4            |
|                           |                      |                                                |             | 18         | 283.1701             | C <sub>19</sub> H <sub>23</sub> O <sub>2</sub> | 2.9            |
|                           |                      |                                                |             | 18         | 151.0754             | C <sub>9</sub> H <sub>11</sub> O <sub>2</sub>  | 0.1            |
|                           |                      |                                                |             | 18         | 149.0961             | C <sub>10</sub> H <sub>13</sub> O              | 0.2            |
|                           |                      |                                                |             | 18         | 133.0648             | C <sub>9</sub> H <sub>9</sub> O                | -0.2           |
| M3                        | 405.1914             | C <sub>22</sub> H <sub>29</sub> O <sub>7</sub> | 1.5         | 18         | 59.0127              | C <sub>2</sub> H <sub>3</sub> O <sub>2</sub>   | -1.6           |
|                           |                      |                                                |             | 18         | 363.1809             | C <sub>20</sub> H <sub>27</sub> O <sub>6</sub> | 1.9            |
|                           |                      |                                                |             | 18         | 345.1704             | C <sub>20</sub> H <sub>25</sub> O <sub>5</sub> | 2.2            |
|                           |                      |                                                |             | 18         | 327.1598             | C <sub>20</sub> H <sub>23</sub> O <sub>4</sub> | 2.2            |
|                           |                      |                                                |             | 18         | 247.0972             | C <sub>14</sub> H <sub>15</sub> O <sub>4</sub> | 2.8            |
|                           |                      |                                                |             | 18         | 219.1020             | C <sub>13</sub> H <sub>15</sub> O <sub>3</sub> | 1.9            |
|                           |                      |                                                |             | 18         | 203.1070             | C <sub>13</sub> H <sub>15</sub> O <sub>2</sub> | 1.5            |
|                           |                      |                                                |             | 18         | 151.0753             | C <sub>9</sub> H <sub>11</sub> O <sub>2</sub>  | -0.1           |
| M4                        | 421.1856             | C <sub>22</sub> H <sub>29</sub> O <sub>8</sub> | -0.1        | 18         | 149.0961             | C <sub>10</sub> H <sub>13</sub> O              | 0.0            |
|                           |                      |                                                |             | 18         | 59.0127              | C <sub>2</sub> H <sub>3</sub> O <sub>2</sub>   | -1.6           |
|                           |                      |                                                |             | 22         | 361.1646             | C <sub>20</sub> H <sub>25</sub> O <sub>6</sub> | 0.0            |
|                           |                      |                                                |             | 22         | 343.1534             | C <sub>20</sub> H <sub>23</sub> O <sub>5</sub> | -0.5           |
|                           |                      |                                                |             | 22         | 303.1227             | C <sub>17</sub> H <sub>19</sub> O <sub>5</sub> | 0.0            |
|                           |                      |                                                |             | 22         | 167.0699             | C <sub>9</sub> H <sub>11</sub> O <sub>3</sub>  | -0.3           |
| M5                        | 421.1855             | C <sub>22</sub> H <sub>29</sub> O <sub>8</sub> | -0.2        | 22         | 149.0596             | C <sub>9</sub> H <sub>9</sub> O <sub>2</sub>   | -0.1           |
|                           |                      |                                                |             | 22         | 59.0125              | C <sub>2</sub> H <sub>3</sub> O <sub>2</sub>   | -0.2           |
|                           |                      |                                                |             | 20         | 361.1647             | C <sub>20</sub> H <sub>25</sub> O <sub>6</sub> | 0.1            |
|                           |                      |                                                |             | 20         | 343.1540             | C <sub>20</sub> H <sub>23</sub> O <sub>5</sub> | 0.0            |
|                           |                      |                                                |             | 20         | 167.0701             | C <sub>9</sub> H <sub>11</sub> O <sub>3</sub>  | -0.1           |
| M6                        | 421.1855             | C <sub>22</sub> H <sub>29</sub> O <sub>8</sub> | -0.1        | 20         | 149.0958             | C <sub>10</sub> H <sub>13</sub> O              | -0.2           |
|                           |                      |                                                |             | 20         | 59.0125              | C <sub>2</sub> H <sub>3</sub> O <sub>2</sub>   | -0.2           |
|                           |                      |                                                |             | 20         | 361.1646             | C <sub>20</sub> H <sub>25</sub> O <sub>6</sub> | 0.0            |
|                           |                      |                                                |             | 20         | 343.1541             | C <sub>20</sub> H <sub>23</sub> O <sub>5</sub> | 0.0            |
|                           |                      |                                                |             | 20         | 235.0966             | C <sub>13</sub> H <sub>15</sub> O <sub>4</sub> | 0.1            |

|     |          |                                                |      |    |          |                                                |      |
|-----|----------|------------------------------------------------|------|----|----------|------------------------------------------------|------|
|     |          |                                                |      | 20 | 205.0858 | C <sub>12</sub> H <sub>13</sub> O <sub>3</sub> | −0.1 |
|     |          |                                                |      | 20 | 149.0594 | C <sub>9</sub> H <sub>9</sub> O <sub>2</sub>   | −0.2 |
|     |          |                                                |      | 20 | 59.0125  | C <sub>2</sub> H <sub>3</sub> O <sub>2</sub>   | −0.2 |
| M7  | 421.1855 | C <sub>22</sub> H <sub>29</sub> O <sub>8</sub> | −0.1 | 22 | 361.1646 | C <sub>20</sub> H <sub>25</sub> O <sub>6</sub> | 0.0  |
|     |          |                                                |      | 22 | 343.1541 | C <sub>20</sub> H <sub>23</sub> O <sub>5</sub> | 0.1  |
|     |          |                                                |      | 22 | 235.0966 | C <sub>13</sub> H <sub>15</sub> O <sub>4</sub> | 0.1  |
|     |          |                                                |      | 22 | 149.0594 | C <sub>9</sub> H <sub>9</sub> O <sub>2</sub>   | −0.3 |
|     |          |                                                |      | 22 | 59.0125  | C <sub>2</sub> H <sub>3</sub> O <sub>2</sub>   | −0.2 |
| M8  | 421.1855 | C <sub>22</sub> H <sub>29</sub> O <sub>8</sub> | −0.1 | 20 | 361.1646 | C <sub>20</sub> H <sub>25</sub> O <sub>6</sub> | 0.0  |
|     |          |                                                |      | 20 | 343.1540 | C <sub>20</sub> H <sub>23</sub> O <sub>5</sub> | 0.0  |
|     |          |                                                |      | 20 | 235.0965 | C <sub>13</sub> H <sub>15</sub> O <sub>4</sub> | 0.0  |
|     |          |                                                |      | 20 | 167.0700 | C <sub>9</sub> H <sub>11</sub> O <sub>3</sub>  | −0.2 |
|     |          |                                                |      | 20 | 59.0125  | C <sub>2</sub> H <sub>3</sub> O <sub>2</sub>   | −0.2 |
| M9  | 421.1852 | C <sub>22</sub> H <sub>29</sub> O <sub>8</sub> | −0.4 | 28 | 361.1645 | C <sub>20</sub> H <sub>25</sub> O <sub>6</sub> | 0.0  |
|     |          |                                                |      | 28 | 343.1535 | C <sub>20</sub> H <sub>23</sub> O <sub>5</sub> | −0.4 |
|     |          |                                                |      | 28 | 167.0700 | C <sub>9</sub> H <sub>11</sub> O <sub>3</sub>  | −0.2 |
|     |          |                                                |      | 28 | 149.0594 | C <sub>9</sub> H <sub>9</sub> O <sub>2</sub>   | −0.3 |
|     |          |                                                |      | 28 | 59.0125  | C <sub>2</sub> H <sub>3</sub> O <sub>2</sub>   | −0.2 |
| M10 | 421.1855 | C <sub>22</sub> H <sub>29</sub> O <sub>8</sub> | −0.2 | 18 | 361.1646 | C <sub>20</sub> H <sub>25</sub> O <sub>6</sub> | 0.0  |
|     |          |                                                |      | 18 | 343.1539 | C <sub>20</sub> H <sub>23</sub> O <sub>5</sub> | 0.0  |
|     |          |                                                |      | 18 | 317.1747 | C <sub>19</sub> H <sub>25</sub> O <sub>4</sub> | 0.0  |
|     |          |                                                |      | 18 | 167.0700 | C <sub>9</sub> H <sub>11</sub> O <sub>3</sub>  | −0.2 |
|     |          |                                                |      | 18 | 59.0125  | C <sub>2</sub> H <sub>3</sub> O <sub>2</sub>   | −0.2 |
| M11 | 423.2011 | C <sub>22</sub> H <sub>31</sub> O <sub>8</sub> | −0.2 | 20 | 363.1803 | C <sub>20</sub> H <sub>27</sub> O <sub>6</sub> | 0.1  |
|     |          |                                                |      | 20 | 345.1696 | C <sub>20</sub> H <sub>25</sub> O <sub>5</sub> | 0.0  |
|     |          |                                                |      | 20 | 301.1798 | C <sub>19</sub> H <sub>25</sub> O <sub>3</sub> | 0.0  |
|     |          |                                                |      | 20 | 151.0750 | C <sub>9</sub> H <sub>11</sub> O <sub>2</sub>  | −0.3 |
|     |          |                                                |      | 20 | 149.0959 | C <sub>10</sub> H <sub>13</sub> O              | −0.2 |
|     |          |                                                |      | 20 | 59.0125  | C <sub>2</sub> H <sub>3</sub> O <sub>2</sub>   | −0.2 |
| M12 | 423.2010 | C <sub>22</sub> H <sub>31</sub> O <sub>8</sub> | −0.3 | 20 | 363.1802 | C <sub>20</sub> H <sub>27</sub> O <sub>6</sub> | 0.0  |
|     |          |                                                |      | 20 | 345.1694 | C <sub>20</sub> H <sub>25</sub> O <sub>5</sub> | −0.2 |
|     |          |                                                |      | 20 | 315.1589 | C <sub>19</sub> H <sub>23</sub> O <sub>4</sub> | −0.1 |
|     |          |                                                |      | 20 | 169.0857 | C <sub>9</sub> H <sub>13</sub> O <sub>3</sub>  | −0.2 |
|     |          |                                                |      | 20 | 149.0958 | C <sub>10</sub> H <sub>13</sub> O              | −0.3 |
|     |          |                                                |      | 20 | 59.0125  | C <sub>2</sub> H <sub>3</sub> O <sub>2</sub>   | −0.2 |
| M13 | 423.2010 | C <sub>22</sub> H <sub>31</sub> O <sub>8</sub> | −0.2 | 28 | 363.1803 | C <sub>20</sub> H <sub>27</sub> O <sub>6</sub> | 0.1  |
|     |          |                                                |      | 28 | 345.1697 | C <sub>20</sub> H <sub>25</sub> O <sub>5</sub> | 0.0  |
|     |          |                                                |      | 28 | 301.1799 | C <sub>19</sub> H <sub>25</sub> O <sub>3</sub> | 0.0  |
|     |          |                                                |      | 28 | 169.0857 | C <sub>9</sub> H <sub>13</sub> O <sub>3</sub>  | −0.1 |
|     |          |                                                |      | 28 | 151.0751 | C <sub>9</sub> H <sub>11</sub> O <sub>2</sub>  | −0.2 |
|     |          |                                                |      | 28 | 149.0958 | C <sub>10</sub> H <sub>13</sub> O              | −0.2 |
|     |          |                                                |      | 28 | 59.0125  | C <sub>2</sub> H <sub>3</sub> O <sub>2</sub>   | −0.2 |
| M14 | 439.1958 | C <sub>22</sub> H <sub>31</sub> O <sub>9</sub> | −0.4 | 25 | 379.1750 | C <sub>20</sub> H <sub>27</sub> O <sub>7</sub> | −0.1 |
|     |          |                                                |      | 25 | 361.1645 | C <sub>20</sub> H <sub>25</sub> O <sub>6</sub> | 0.0  |
|     |          |                                                |      | 25 | 317.1745 | C <sub>19</sub> H <sub>25</sub> O <sub>4</sub> | −0.2 |
|     |          |                                                |      | 25 | 169.0857 | C <sub>9</sub> H <sub>13</sub> O <sub>3</sub>  | −0.2 |
|     |          |                                                |      | 25 | 165.0908 | C <sub>10</sub> H <sub>13</sub> O <sub>2</sub> | −0.2 |
|     |          |                                                |      | 25 | 151.0751 | C <sub>9</sub> H <sub>11</sub> O <sub>2</sub>  | −0.2 |
|     |          |                                                |      | 25 | 59.0125  | C <sub>2</sub> H <sub>3</sub> O <sub>2</sub>   | −0.2 |
| M15 | 439.1958 | C <sub>22</sub> H <sub>31</sub> O <sub>9</sub> | −0.4 | 28 | 379.1750 | C <sub>20</sub> H <sub>27</sub> O <sub>7</sub> | 0.0  |
|     |          |                                                |      | 28 | 169.0857 | C <sub>9</sub> H <sub>13</sub> O <sub>3</sub>  | −0.2 |
|     |          |                                                |      | 28 | 165.0908 | C <sub>10</sub> H <sub>13</sub> O <sub>2</sub> | −0.2 |

|     |          |                                                |      |    |          |                                                |      |
|-----|----------|------------------------------------------------|------|----|----------|------------------------------------------------|------|
|     |          |                                                |      | 28 | 151.0751 | C <sub>9</sub> H <sub>11</sub> O <sub>2</sub>  | −0.2 |
|     |          |                                                |      | 28 | 59.0125  | C <sub>2</sub> H <sub>3</sub> O <sub>2</sub>   | −0.2 |
| M16 | 439.1958 | C <sub>22</sub> H <sub>31</sub> O <sub>9</sub> | −0.4 | 28 | 379.1750 | C <sub>20</sub> H <sub>27</sub> O <sub>7</sub> | 0.0  |
|     |          |                                                |      | 28 | 185.0807 | C <sub>9</sub> H <sub>13</sub> O <sub>4</sub>  | −0.1 |
|     |          |                                                |      | 28 | 167.0701 | C <sub>9</sub> H <sub>11</sub> O <sub>3</sub>  | −0.1 |
|     |          |                                                |      | 28 | 149.0958 | C <sub>10</sub> H <sub>13</sub> O              | −0.2 |
|     |          |                                                |      | 28 | 59.0125  | C <sub>2</sub> H <sub>3</sub> O <sub>2</sub>   | −0.2 |
| M17 | 439.1960 | C <sub>22</sub> H <sub>31</sub> O <sub>9</sub> | −0.2 | 30 | 379.1751 | C <sub>20</sub> H <sub>27</sub> O <sub>7</sub> | 0.0  |
|     |          |                                                |      | 30 | 361.1646 | C <sub>20</sub> H <sub>25</sub> O <sub>6</sub> | 0.0  |
|     |          |                                                |      | 30 | 185.0808 | C <sub>9</sub> H <sub>13</sub> O <sub>4</sub>  | 0.0  |
|     |          |                                                |      | 30 | 167.0701 | C <sub>9</sub> H <sub>11</sub> O <sub>3</sub>  | −0.1 |
|     |          |                                                |      | 30 | 149.0959 | C <sub>10</sub> H <sub>13</sub> O              | −0.2 |
|     |          |                                                |      | 30 | 59.0125  | C <sub>2</sub> H <sub>3</sub> O <sub>2</sub>   | −0.2 |
| M18 | 439.1957 | C <sub>22</sub> H <sub>31</sub> O <sub>9</sub> | −0.3 | 30 | 379.1750 | C <sub>20</sub> H <sub>27</sub> O <sub>7</sub> | 0.0  |
|     |          |                                                |      | 30 | 185.0806 | C <sub>9</sub> H <sub>13</sub> O <sub>4</sub>  | −0.2 |
|     |          |                                                |      | 30 | 167.0700 | C <sub>9</sub> H <sub>11</sub> O <sub>3</sub>  | −0.2 |
|     |          |                                                |      | 30 | 149.0957 | C <sub>10</sub> H <sub>13</sub> O              | −0.2 |
|     |          |                                                |      | 30 | 59.0125  | C <sub>2</sub> H <sub>3</sub> O <sub>2</sub>   | −0.2 |
| M19 | 439.1956 | C <sub>22</sub> H <sub>31</sub> O <sub>9</sub> | −0.6 | 33 | 379.1749 | C <sub>20</sub> H <sub>27</sub> O <sub>7</sub> | −0.2 |
|     |          |                                                |      | 33 | 361.1645 | C <sub>20</sub> H <sub>25</sub> O <sub>6</sub> | 0.0  |
|     |          |                                                |      | 33 | 169.0857 | C <sub>9</sub> H <sub>13</sub> O <sub>3</sub>  | −0.2 |
|     |          |                                                |      | 33 | 165.0907 | C <sub>10</sub> H <sub>13</sub> O <sub>2</sub> | −0.2 |
|     |          |                                                |      | 33 | 151.0750 | C <sub>9</sub> H <sub>11</sub> O <sub>2</sub>  | −0.3 |
|     |          |                                                |      | 33 | 59.0125  | C <sub>2</sub> H <sub>3</sub> O <sub>2</sub>   | −0.2 |
| M20 | 439.1958 | C <sub>22</sub> H <sub>31</sub> O <sub>9</sub> | −0.4 | 22 | 379.1751 | C <sub>20</sub> H <sub>27</sub> O <sub>7</sub> | 0.0  |
|     |          |                                                |      | 22 | 185.0803 | C <sub>9</sub> H <sub>13</sub> O <sub>4</sub>  | −0.5 |
|     |          |                                                |      | 22 | 167.0700 | C <sub>9</sub> H <sub>11</sub> O <sub>3</sub>  | −0.2 |
|     |          |                                                |      | 22 | 149.0957 | C <sub>10</sub> H <sub>13</sub> O              | −0.4 |
|     |          |                                                |      | 22 | 59.0125  | C <sub>2</sub> H <sub>3</sub> O <sub>2</sub>   | −0.2 |

CE, collision energy; comp., composition; exp., experiment.
